# Supplementary material for: Trace Elements and Persistent Organic Pollutants in Unhatched Loggerhead Turtle Eggs from an Emerging Nesting Site along the Southwestern Coasts of Italy, Western Mediterranean Sea
Source: MDPI journal article supplement (doi:10.3390/ani13061075), 2023-03-16
Supplement: s1 [file s1]

Table S1: Statistical values (Min, Q1, median, Q3, Max) of trace element concentrations found in the egg samples of loggerhead sea turtle expressed in mg kg<sup>-1</sup> w.w.

| Element | Min    | Q1     | median | Q3    | Max   |
|---------|--------|--------|--------|-------|-------|
| Hg      | 0.0020 | 0.0078 | 0.011  | 0.017 | 0.027 |
| As      | 0.39   | 0.86   | 1.11   | 1.31  | 2.01  |
| Cd      | 0.001  | 0.003  | 0.005  | 0.008 | 0.015 |
| Pb      | 0.009  | 0.022  | 0.030  | 0.040 | 0.071 |
| Co      | 0.002  | 0.007  | 0.011  | 0.016 | 0.029 |
| Cr      | 0.022  | 0.048  | 0.065  | 0.10  | 0.43  |
| Cu      | 0.460  | 0.884  | 1.20   | 1.44  | 2.06  |
| Fe      | 9.5    | 15.1   | 20.1   | 22.1  | 28.3  |
| Ga      | 0.050  | 0.174  | 0.227  | 0.263 | 0.326 |
| Mn      | 0.254  | 0.722  | 1.18   | 2.01  | 4.78  |
| Ni      | 0.011  | 0.023  | 0.038  | 0.061 | 0.25  |
| Rb      | 0.160  | 0.374  | 0.458  | 0.506 | 0.660 |
| Se      | 0.470  | 0.857  | 1.12   | 1.34  | 1.95  |
| Sr      | 14.0   | 32.4   | 40.6   | 46.4  | 54.2  |
| V       | 0.012  | 0.028  | 0.034  | 0.047 | 0.081 |
| Zn      | 10.4   | 23.4   | 29.4   | 36.8  | 52.4  |

Min: minimum value; Q1: first quartile (25% percentile); Q3: third quartile (75% percentile); Max: maximum value.

Table S2: Statistical values (Min, Q1, median, Q3, Max) of six PCB congeners and their sum in egg content of loggerhead sea turtles expressed as ng g<sup>-1</sup> of lipid

| PCB    | Min   | Q1   | Median | Q3   | Max   |
|--------|-------|------|--------|------|-------|
| 28     | 0.10  | 0.19 | 0.24   | 0.30 | 0.63  |
| 52     | 0.099 | 0.14 | 0.19   | 0.28 | 0.69  |
| 101    | 0.17  | 0.34 | 0.42   | 0.50 | 1.3   |
| 138    | 4.2   | 7.4  | 9.68   | 13.7 | 31.8  |
| 153    | 8.1   | 14.9 | 19.2   | 26.8 | 69.7  |
| 180    | 3.5   | 7.1  | 9.3    | 13.1 | 35.6  |
| Σ PCBs | 16.9  | 30.5 | 38.9   | 53.7 | 133.3 |

Min: minimum value; Q1: first quartile (25% percentile); Q3: third quartile (75% percentile); Max: maximum value
